# Supplementary material for: Mass transfer investigation in a horizontal–vertical pulsed packed extraction column
Source: Royal Society of Chemistry journal article supplement (doi:10.1039/c7ra07999k), 2017-01-01
Supplement: c7ra07999k1.pdf [file c7ra07999k1.pdf]

## Supplemental file

Table S1 is provided for comparison between experimental data of overall mass transfer coefficient based on continuous phase and predicted values by the previous correlations for several mechanical extraction columns, i.e., pulse sieve plate column (PSC), pulse packed column (PPC), rotating disc contactor (RDC), Kühni and spray column. Average absolute relative deviation (AARD) is used to compare the results. As can be seen from Table S1, none of previous correlations are suitable to accurately determine the overall mass transfer coefficient in the horizontal-vertical pulsed packed column. However, deviation values represents the experimental data for overall mass transfer coefficient obtained in the horizontal-vertical pulse packed extraction column are roughly similar to those obtained in the other extraction columns (the last six equations).

**Table S1- The AARE between the  $K_{oc}$  obtained by the previous correlation and experimental data**

| Researcher                              | Equation                                                                                                                                                                                                                  | AARD (%) |     |
|-----------------------------------------|---------------------------------------------------------------------------------------------------------------------------------------------------------------------------------------------------------------------------|----------|-----|
|                                         |                                                                                                                                                                                                                           | H        | V   |
| Lochiel and Calderbank <sup>35</sup>    | $Sh_c = 0.7Re^{0.5}Sc_c^{1/3}$<br>High Reynolds number                                                                                                                                                                    | 420      | 513 |
| Clift et al. <sup>33</sup>              | $Sh_c = \frac{2}{\sqrt{\pi}}(Pe_c)^{1/2}$<br>High Reynolds number                                                                                                                                                         | 732      | 802 |
| Brauer et al. <sup>29</sup>             | $Sh_c = 2 + \left[ \frac{0.66}{1 + Sc_c} + \frac{Sc_c}{2.4 + Sc_c} \left( \frac{0.79}{Sc_c^{1/6}} \right) \right] \left( \frac{Pe_c^{1.7}}{1 + Pe_c^{1.2}} \right)$<br>$1 < Re < 1000$                                    | 330      | 373 |
| Clift et al. <sup>33</sup>              | $Sh_c = 1 + 0.724Re^{0.48}Sc_c^{1/3}$<br>$100 < Re < 2000, Sc > 200$                                                                                                                                                      | 410      | 493 |
| Weber et al. <sup>34</sup>              | $Sh_c = 2 \left( \frac{Pe_c}{\pi} \right)^{1/2} \left[ 1 - \frac{1}{Re^{1/2}} \left( 2.89 + 2.15 \left( \frac{\mu_d}{\mu_c} \right)^{0.64} \right) \right]^{1/2}$<br>$\frac{\rho_d}{\rho_c} < 4; \frac{\mu_d}{\mu_c} < 4$ | 273      | 300 |
| Seibert and Fair <sup>32</sup>          | $Sh_c = 0.698 Re^{0.5} Sc_c^{0.4} (1 - \varphi)$                                                                                                                                                                          | 295      | 316 |
| He et al. <sup>30</sup>                 | $K_{oc}a = 1.4296u_c^{0.6685}u_d^{0.2404}Af^{0.5536}$<br>$D_c = 0.05 m$                                                                                                                                                   | 98       | 113 |
| Torab-mostaedi and safdari <sup>9</sup> | $Sh_{Oc} = -49.76 + 14.8 Re^{0.64}$<br>C to d direction, $10 < Re < 150$                                                                                                                                                  | 54       | 71  |

|                                     |                                                                                                                                                                                                                                                                                                                                                                                                                                                                                                                                                                                                                                                                                                               |                        |           |
|-------------------------------------|---------------------------------------------------------------------------------------------------------------------------------------------------------------------------------------------------------------------------------------------------------------------------------------------------------------------------------------------------------------------------------------------------------------------------------------------------------------------------------------------------------------------------------------------------------------------------------------------------------------------------------------------------------------------------------------------------------------|------------------------|-----------|
| Safari et al. <sup>12</sup>         | $\frac{K_{oc}ad_{32}}{\rho_c u_{slip}} = 1.9 \times 10^{-8} \frac{Re^{1.78}}{(1-\varphi)^2} \left(\frac{Af}{u_{slip}}\right)^{0.09} \left(\frac{u_d}{u_c}\right)^{1.62}$                                                                                                                                                                                                                                                                                                                                                                                                                                                                                                                                      | 91                     | 103       |
| Asadollahzadeh et al. <sup>16</sup> | $Sh_{oc} = -12.2 + 8.56Re^{0.514}(1-\varphi)$ C to d direction, $4.99 < Re < 23.96$                                                                                                                                                                                                                                                                                                                                                                                                                                                                                                                                                                                                                           | 65                     | 83        |
| Torab-mostaedi et al. <sup>19</sup> | $Sh_{oc} = 12.34 + 0.116Re^{1.389}$<br>$Sh_{oc} = 2.586 + 0.000217Re^{4.86}$                                                                                                                                                                                                                                                                                                                                                                                                                                                                                                                                                                                                                                  | $Re > 10$<br>$Re < 10$ | 89<br>105 |
| Kumar and Hartland <sup>31</sup>    | $\frac{Sh_c/(1-\varphi) - Sh_{c,rigid}}{Sh_{c,\infty} - Sh_c/(1-\varphi)} = 5.26 \times 10^{-2} Re^{\frac{1}{3} + 6.59 \times 10^{-2} Re^{\frac{1}{4}}} Sc_c^{1/3} \left(\frac{V_s \mu_c}{\sigma}\right)^{1/3} \frac{1}{1 + (\mu_d)}$ $Sh_d = 17.7 + \frac{3.19 \times 10^{-3} (Re Sc_d^{1/3})^{1.7}}{1 + 1.43 \times 10^{-2} (Re Sc_d^{1/3})^{0.7}} \left(\frac{\rho_d}{\rho_c}\right)^{2/3} \frac{1}{1 + (\mu_d/\mu_c)^{2/3}} \left[1 + 4.33 \left(\frac{\varepsilon_D}{g}\right)\right]$ $\varepsilon_D = \frac{2\pi^2(1-\alpha^2)}{3hC_D^2\alpha^2} Af^3 \quad C_D = 0.6$ $Sh_{c,rigid} = 2.43 + 0.775Re^{1/2} Sc_c^{1/3} + 0.0103Re Sc_c^{1/3}$ $Sh_{c,\infty} = 50 + \frac{2}{\sqrt{\pi}} (Pe_c)^{1/2}$ | 73                     | 84        |
